# Supplementary material for: Cheliensisin A (Chel A) induces apoptosis in human bladder cancer cells by promoting PHLPP2 protein degradation
Source: PubMed Central journal article supplement (PMC5341830; doi:10.18632/oncotarget.11440), 2016-08-20
Supplement: oncotarget-07-66689-s001.pdf [file oncotarget-07-66689-s001.pdf]

## Cheliensisin A (Chel A) induces apoptosis in human bladder cancer cells by promoting PHLPP2 protein degradation

### Supplementary Materials

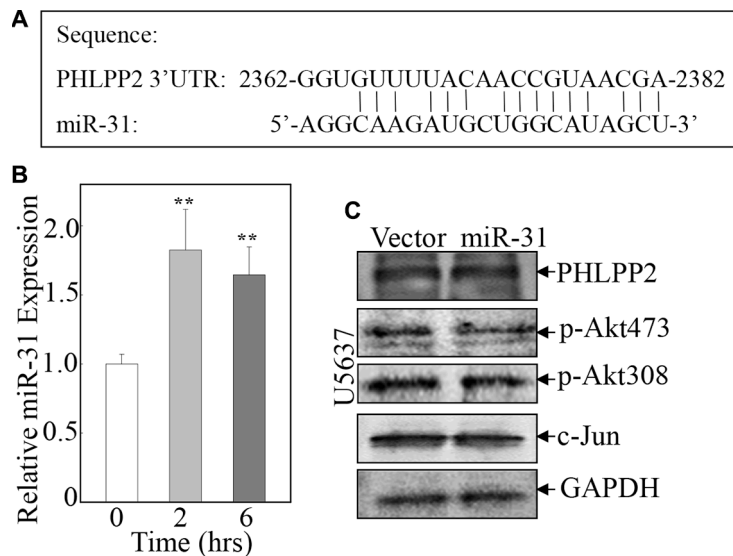

**Supplementary Figure S1:** (A) shows a sequence complementarity between PHLPP2 and miR-31. (B) After being exposed to 4  $\mu$ M Chel A for the indicated time points, U5637 cells were harvested for RNA isolation. QT-PCR was employed to examine the relative expression of miR-31. (C) Stable overexpression of miR-31 transfectants were established in the U5637 cells. After synchronization, U5637 (vector) and U5637 (miR-31) were harvested for Western Blotting with the indicated antibodies.
